# Supplementary material for: A tRNA-derived RNA Fragment Plays an Important Role in the Mechanism of Arsenite -induced Cellular Responses
Source: PubMed Central journal article supplement (PMC6237853; doi:10.1038/s41598-018-34899-2), 2018-11-15
Supplement: 41598_2018_34899_MOESM1_ESM.pdf [file 41598_2018_34899_MOESM1_ESM.pdf]

**A tRNA-derived RNA Fragment Plays an Important Role in  
the Mechanism of Arsenite -induced Cellular Responses**

**Shengxuan Liu, Yu Chen, Yuping Ren, Jiehua Zhou, Junping Ren, Inhan Lee, & Xiaoyong Bao**

**tRNA-Lys-CTT** 5'-GCCCCGGCTAGCTCAGTCGGTAGAGCATGAGACTCTTAATCTCAGGGTCGTGGGTTCGAGCCCCACGTTGGGCG (CCA)-3' (73 nt)

**tRF5-LysCTT** 5'-GCCCCGGCTAGCTCAGTCGGTAGAGCATGAG-3' (30 nt, 14-fold induction)

|||||  
3'-CCGATCGAGTCAGCCATCTCGTAC-5'

**Northern probe**

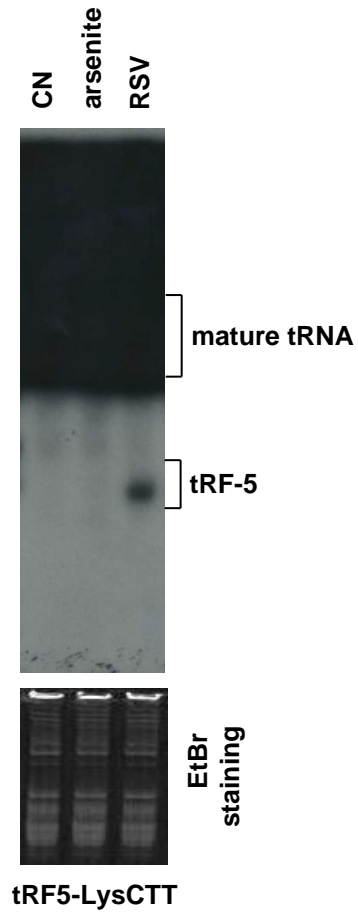

| Sequence                         | Origin    | Relative sequencing frequency (% of total sequencing reads ) |        |
|----------------------------------|-----------|--------------------------------------------------------------|--------|
|                                  |           | Untreated                                                    | NiCl   |
| GGGGGTATAGCTCAGCGGTAGAGCGCGTGCT  | AlaAGC    | 0.01                                                         | 0.05   |
| GGGGATGTAGCTCAGTGGTAGAGCGCGCTTC  | AlaCGC    | 0.13                                                         | 0.39   |
| GGGGGTGTAGCTCAGTGGTAGAGCGCGTGCT  | AlaTGC    | 0.10                                                         | 0.43   |
| GACCCAGTGGCCTAATGGATAAGGCATCAGC  | ArgCCG    | 0.05                                                         | 0.21   |
| GACCGCGTGGCCTAATGGATAAGGCGTCTGA  | ArgTCG    | 0.00                                                         | 0.02   |
| GGCTCCGTGGCGCAATGGATAGCGCATTGGA  | ArgTCT-A  | 0.03                                                         | 0.17   |
| GGCTCTGGCGCAATGGATAGCGCATTGGACT  | ArgTCT-B  | 0.01                                                         | 0.06   |
| GCATTGTGGTTCAGTGGTAGAATTCTCGCCT  | GlyGCC -A | 40.81                                                        | 86.54  |
| GCATGTGGTTCAGTGGTAGAATTCTCGCCTA  | GlyGCC -B | 1.13                                                         | 3.32   |
| GCGCCGCTGGTGTAGTGGTATCATGCAAGAT  | GlyGCC-C  | 0.52                                                         | 1.49   |
| GGTCCCATGGTGTAAATGGTTAGCACTCTGGA | GlnCAA    | 0.00                                                         | 0.02   |
| GGTCCATGGTGTAAATGGTTAGCACTCTGGA  | GlnCAG    | 0.07                                                         | 0.44   |
| GGTCCATGGTGTAAATGGTAAGCACTCTGGA  | GlnCTG    | 0.06                                                         | 0.03   |
| GGCCCCATGGTGTAAATGGTTAGCACTCTGGA | GlnTTG    | 0.00                                                         | 0.01   |
| GCCCCGCTAGCTCAGTCGGTAGAGCATGAGA  | LysCTT-A  | 76.70                                                        | 241.53 |
| GCCCCGCTAGCTCAGTCGGTAGAGCATGGGA  | LysCTT-B  | 22.33                                                        | 47.80  |
| GCCCCGATAGCTCAGTCGGTAGAGCATCAGA  | LysTTT-C  | 1.74                                                         | 5.92   |
| GGCCGGTTAGCTCAGTTGGTTAGAGCGTGGT  | LleAAT    | 0.02                                                         | 0.09   |
| AGCAGAGTGGCGCAGCGGAAGCGTGCTGGGC  | MetCAT-A  | 0.65                                                         | 4.07   |
| AGCAGTGGCGCAGCGGAAGCGTGCTGGGCC   | MetCAT-B  | 0.01                                                         | 0.12   |
| GCCTCGTTAGCGCAGTAGGTAGCGCGTCAGT  | MetCAT-C  | 0.01                                                         | 0.04   |
| GGCTTGGTCTAGGGGTATGATTCTCGCTTCA  | ProTGG    | 0.20                                                         | 1.51   |
| GACGAGGTGGCCGAGTGGTTAAGGCGATGGA  | SerGCT    | 0.29                                                         | 0.72   |
| GGCTCCATAGCTCAGGGTTAGAGCACTGGT   | ThrTGT    | 0.02                                                         | 0.05   |

**Supplementary Table I:** Summary of tRF-5 series with a relative cloning frequency > 0.02% (reads per mil) in samples treated with nickel for 6 h

| Sequence                         | Origin   | Relative sequencing frequency (‰ of total sequencing) |        |
|----------------------------------|----------|-------------------------------------------------------|--------|
|                                  |          | Untreated                                             | Cobalt |
| GGGGGTATAGCTCAGCGGTAGAGCGGTGCT   | AlaAGC   | 0.01                                                  | 0.03   |
| GGCTCCGTGGCGCAATGGATAGCGCATTGGA  | ArgTCT   | 0.03                                                  | 0.08   |
| GCATTGTGGTTCAGTGGTAGAATTCTCGCCT  | GlyGCC 1 | 40.81                                                 | 90.65  |
| GCATGTGGTTCAGTGGTAGAATTCTCGCCTA  | GlyGCC 2 | 1.13                                                  | 3.00   |
| GGTTCCATGGTGTAAATGGTTAGCACTCTGGA | GlnCAG   | 0.07                                                  | 0.22   |
| GGTTCCATGGTGTAAATGGTAAGCACTCTGGA | GlnCTG   | 0.01                                                  | 0.02   |
| GGCCGGTTAGCTCAGTTGGTTAGAGCGTGGT  | LleAAT   | 0.02                                                  | 0.08   |
| GGCTTGGTCTAGGGGTATGATTCTCGCTTCA  | ProCGG   | 0.01                                                  | 0.02   |
| GACGAGGTGGCCGAGTGGTTAAGCGATGGA   | SerGCT   | 0.29                                                  | 1.04   |
| GTCACGGTGGCCGAGTGGTTAAA          | SerCGA   | 0.02                                                  | 0.08   |

**Supplementary Table II**, Summary of tRF-5 series with a relative cloning frequency > 0.02‰ (reads per mil) in cobalt-treated samples

## Supplementary Figure Legends

**S. Figure 1.** Total RNAs from A549 cells, treated with arsenite (lane 2) as described in Figure 2 or infected with RSV (lane 3, a positive control) at the multiplicity of infection of 3 for 6 h, were loaded to a denaturing polyacrylamide gel for Northern hybridization using a probe indicated in S. Figure 1 A. Untreated cells were used as control. Total RNAs stained with ethidium bromide (EtBr) staining are shown for equal loading. The positions of tRF5-LycCTT and its corresponding mature tRNA are indicated on the right.

**S. Table I. Summary of tRF-5 series with a relative cloning frequency > 0.02‰ (reads per mil) in NiCl-treated samples.** The relative cloning frequency of a tRF was calculated and sorted as described in Table I. For tRNA isoforms sharing the same anticodon, they were in alpha-beta order according to the abundance of tRF-5 series in the NiCl-treated sample.

**S. Table II. Summary of tRF-5 series with a relative cloning frequency > 0.02‰ (reads per mil) in cobalt-treated samples.** The relative cloning frequency of a tRF was calculated and sorted as described in Table I. For tRNA isoforms sharing the same anticodon, they were sequentially numbered according to the abundance of tRF5s in the cobalt-treated sample.
